# Supplementary material for: Copper coordination compounds of chelating imidazole-azo-aryl ligand. The molecular structures of bis[1-ethyl-2-(p-tolylazo)imidazole]-bis-(azido)copper(ii) and bis[1-methyl-2-(phenylazo)imidazole]-bis(thiocyanato)copper(ii)
Source: Royal Society of Chemistry journal article supplement (doi:10.1039/b406445c), 2004-01-01
Supplement: b406445c.pdf [file b406445c.pdf]

## Supplementary data

**Table S1** Bond distance and bond angle of [Cu(MeaaiEt)<sub>2</sub>(N<sub>3</sub>)<sub>2</sub>] (**4b**)

| Bond distance | (Å)      | Bond angle    | (°)        |
|---------------|----------|---------------|------------|
| Cu – N1       | 2.011(2) | N1 – Cu – N4  | 68.70(8)   |
| Cu – N4       | 2.661(2) | N1 – Cu – N5  | 91.04(10)  |
| Cu – N5       | 2.011(2) | N4 – Cu – N9  | 99.93(9)   |
| Cu – N8       | 2.693(2) | N1 – Cu – N9  | 89.69(10)  |
| Cu – N9       | 1.960(3) | N1 – Cu – N12 | 170.23(11) |
| Cu – N12      | 1.972(3) | N5 – Cu – N9  | 170.38(11) |
| N3 – N4       | 1.262(3) | N5 – Cu – N12 | 87.44 (11) |
| N7 – N8       | 1.266(3) | N9 – Cu – N12 | 93.42 (11) |
|               |          | N8 – Cu – N9  | 102.41(9)  |
|               |          | N8 – Cu – N12 | 101.08(10) |
|               |          | N5 – Cu – N8  | 68.05(8)   |
|               |          | N4 – Cu – N8  | 146.92(7)  |
|               |          | N1 – Cu – N8  | 87.26(8)   |
|               |          | N4 – Cu – N12 | 101.61(9)  |
|               |          | N4 – Cu – N5  | 89.27(8)   |

**Table S2** Bond distance and bond angle of [Cu(HaaiMe)<sub>2</sub>(SCN)<sub>2</sub>]DMF (**5a**)

| Bond distance | (Å)      | Bond angle    | (°)        |
|---------------|----------|---------------|------------|
| Cu – N1       | 1.942(3) | N1 – Cu – N2  | 90.92(14)  |
| Cu – N2       | 1.953(3) | N1 – Cu – N3  | 171.65(13) |
| Cu – N3       | 2.009(3) | N1 – Cu – N7  | 102.07(12) |
| Cu – N4       | 1.999(3) | N2 – Cu – N3  | 90.18(13)  |
| Cu – N7       | 2.612(3) | N2 – Cu – N7  | 100.41(11) |
| Cu – N10      | 2.627(3) | N3 – Cu – N7  | 69.59(9)   |
| N6 – N7       | 1.265(3) | N1 – Cu – N10 | 105.17(11) |
| N9 – N10      | 1.259(4) | N2 – Cu – N10 | 103.24(12) |
|               |          | N1 – Cu – N4  | 90.22(12)  |
|               |          | N2 – Cu – N4  | 172.27(13) |
|               |          | N3 – Cu – N10 | 82.62(9)   |
|               |          | N4 – Cu – N10 | 69.10(9)   |
|               |          | N4 – Cu – N7  | 86.82(9)   |
|               |          | N7 – Cu – N10 | 143.30(8)  |

**Table S3** UV-Vis spectra<sup>a</sup>, I.R. data, magnetic moment (RT) data ( $\mu$ )

| Compound                                                                 | UV-Vis spectral data<br>( $\lambda_{\max}/\text{nm}$ )<br>( $10^{-3} \epsilon \text{ M}^{-1} \text{ cm}^{-1}$ ) | I.R. data                              |                                        |                          |                          | $\mu$<br>(B.M.) |
|--------------------------------------------------------------------------|-----------------------------------------------------------------------------------------------------------------|----------------------------------------|----------------------------------------|--------------------------|--------------------------|-----------------|
|                                                                          |                                                                                                                 | $\nu(\text{N}_3^-)$                    | $\nu(\text{SCN}^-)$                    | $\nu(\text{C}=\text{N})$ | $\nu(\text{N}=\text{N})$ |                 |
| [Cu(HaaiMe) <sub>2</sub> (N <sub>3</sub> ) <sub>2</sub> ] ( <b>3a</b> )  | 710(0.41), 582(0.73),<br>478(3.32), 385(12.43)                                                                  | 2045 <sup>w</sup><br>2038 <sup>s</sup> |                                        | 1589                     | 1438                     | 1.87            |
| [Cu(HaaiEt) <sub>2</sub> (N <sub>3</sub> ) <sub>2</sub> ] ( <b>4a</b> )  | 712(0.43), 582(0.79),<br>474(2.81), 382(13.47)                                                                  | 2047 <sup>w</sup><br>2036 <sup>s</sup> |                                        | 1586                     | 1440                     | 1.80            |
| [Cu(MeaaiMe) <sub>2</sub> (N <sub>3</sub> ) <sub>2</sub> ] ( <b>3b</b> ) | 716(0.39), 586(0.71),<br>474(2.69), 384(12.15)                                                                  | 2045 <sup>w</sup><br>2035 <sup>s</sup> |                                        | 1587                     | 1440                     | 1.83            |
| [Cu(MeaaiEt) <sub>2</sub> (N <sub>3</sub> ) <sub>2</sub> ] ( <b>4b</b> ) | 718(0.39), 584(0.69),<br>472(3.84), 384(12.43)                                                                  | 2045 <sup>w</sup><br>2031 <sup>s</sup> |                                        | 1598                     | 1448                     | 1.90            |
| [Cu(HaaiMe) <sub>2</sub> (SCN) <sub>2</sub> ] DMF ( <b>5a</b> )          | 700(0.51), 586(0.65),<br>458(2.34), 380(12.51)                                                                  |                                        | 2091 <sup>w</sup><br>2107 <sup>s</sup> | 1598                     | 1436                     | 1.81            |
| [Cu(HaaiEt) <sub>2</sub> (SCN) <sub>2</sub> ] DMF ( <b>6a</b> )          | 702(0.56), 585(0.68),<br>456(2.31), 384(11.67)                                                                  |                                        | 2090 <sup>w</sup><br>2103 <sup>s</sup> | 1596                     | 1438                     | 1.84            |
| [Cu(MeaaiMe) <sub>2</sub> (SCN) <sub>2</sub> ] DMF ( <b>5b</b> )         | 703(0.62), 580(0.75),<br>454(3.15), 382(10.89)                                                                  |                                        | 2093 <sup>w</sup><br>2105 <sup>s</sup> | 1597                     | 1442                     | 1.82            |
| [Cu(MeaaiEt) <sub>2</sub> (SCN) <sub>2</sub> ] DMF ( <b>6b</b> )         | 703(0.73), 584(0.91),<br>452(4.85), 380(11.65)                                                                  |                                        | 2090 <sup>w</sup><br>2098 <sup>s</sup> | 1596                     | 1436                     | 1.86            |

<sup>a</sup> Solvent: Acetonitrile (MeCN); w = weak, s = strong

**Table S4** E.s.r and cyclic voltammetric data

| Complexes                                                                | E.s.r data      |             |                 |             | Cyclic voltammetric data <sup>b</sup> |                |                |                  |                 |                 |
|--------------------------------------------------------------------------|-----------------|-------------|-----------------|-------------|---------------------------------------|----------------|----------------|------------------|-----------------|-----------------|
|                                                                          | $g_{\parallel}$ | $g_{\perp}$ | $A_{\parallel}$ | $A_{\perp}$ | $E_{1/2}$ (V) ( $\Delta E_p$ , mV)    | $Cu^{II}/Cu^I$ | $Cu^I/Cu^0$    | Ligand reduction |                 |                 |
|                                                                          |                 |             |                 |             |                                       |                |                | 1 <sup>st</sup>  | 2 <sup>nd</sup> | 3 <sup>rd</sup> |
| [Cu(HaaiMe) <sub>2</sub> (N <sub>3</sub> ) <sub>2</sub> ] ( <b>3a</b> )  | 2.245           | 2.043       | 152             | 16          | 0.42<br>(140)                         | -0.08          | -0.47<br>(160) | -0.82<br>(140)   | -1.05           |                 |
| [Cu(MeaaiMe) <sub>2</sub> (N <sub>3</sub> ) <sub>2</sub> ] ( <b>3b</b> ) | 2.242           | 2.045       | 156             | 14          | 0.39<br>(130)                         | -0.12          | -0.51<br>(150) | -0.88<br>(140)   | -1.15           |                 |
| [Cu(HaaiEt) <sub>2</sub> (N <sub>3</sub> ) <sub>2</sub> ]( <b>4a</b> )   | 2.248           | 2.042       | 160             | 13          | 0.44<br>(130)                         | -0.10          | -0.45<br>(150) | -0.80<br>(150)   | -1.08           |                 |
| [Cu(MeaaiEt) <sub>2</sub> (N <sub>3</sub> ) <sub>2</sub> ] ( <b>4b</b> ) | 2.250           | 2.040       | 158             | 14          | 0.38<br>(140)                         | -0.12          | -0.50<br>(160) | -0.91<br>(160)   | -1.10           |                 |
| [Cu(HaaiMe) <sub>2</sub> (SCN) <sub>2</sub> ]<br>DMF ( <b>5a</b> )       | 2.257           | 2.062       | 160             | 14          | 0.38<br>(130)                         | -0.12          | -0.50<br>(150) | -0.90<br>(160)   | -1.14           |                 |
| [Cu(MeaaiMe) <sub>2</sub> (SCN) <sub>2</sub> ]<br>DMF ( <b>5b</b> )      | 2.249           | 2.051       | 160             | 13          | 0.34<br>(130)                         | -0.08          | -0.54<br>(160) | -0.92<br>(160)   | -1.16           |                 |
| [Cu(HaaiEt) <sub>2</sub> (SCN) <sub>2</sub> ]DMF<br>( <b>6a</b> )        | 2.247           | 2.081       | 160             | 12          | 0.40<br>(140)                         | -0.10          | -0.55<br>(150) | -0.92<br>(140)   | -1.00           |                 |
| [Cu(MeaaiEt) <sub>2</sub> (SCN) <sub>2</sub> ]<br>DMF ( <b>6b</b> )      | 2.248           | 2.074       | 158             | 14          | 0.37<br>(150)                         | -0.08          | -0.50<br>(150) | -0.88<br>(140)   | -1.10           |                 |

Supplementary Material for New Journal of Chemistry  
This journal is © The Royal Society of Chemistry and  
The Centre National de la Recherche Scientifique, 2004

<sup>b</sup> Solvent in MeCN, Pt-disk working electrode, supporting electrolyte, TBAP (0.01 M); solute concentration,  $10^{-3}$  M; scan rate,  $0.05 \text{ V s}^{-1}$ ;  $\Delta E_p = |E_{pa} - E_{pc}|$ , mV;  $E_{pa}$  = anodic peak potential,  $E_{pc}$  = cathodic peak potential, V;  $E_{1/2} = 0.5(E_{pa} + E_{pc})$ , V.
